# Supplementary material for: Post-translational modification localizes MYC to the nuclear pore basket to regulate a subset of target genes involved in cellular responses to environmental signals
Source: PubMed Central journal article supplement — Genes Dev. 2018 Nov 1;32(21-22):1398–419. doi: 10.1101/gad.314377.118 (PMC6217735; doi:10.1101/gad.314377.118), 2018-11-01
Supplement: supp_gad.314377.118_Supplemental_Figure_1.pdf [file supp_gad.314377.118_Supplemental_Figure_1.pdf]

Supplemental\_Figure\_1 for Figure 1.

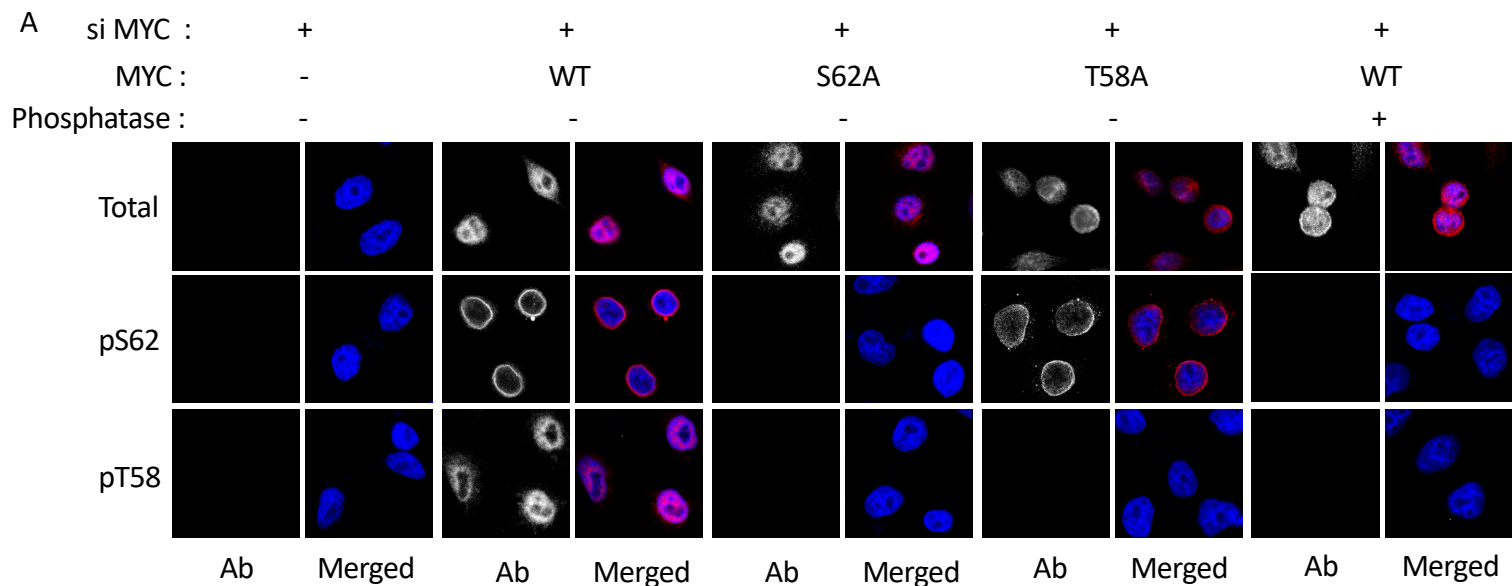

**B** si MYC : + + + + MYC : - WT S62A T58A

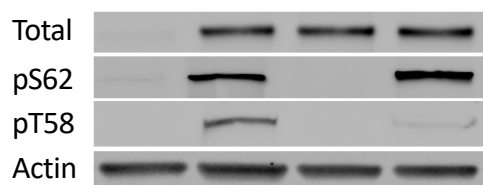

White & Red: Indicated antibodies; Blue: DAPI.

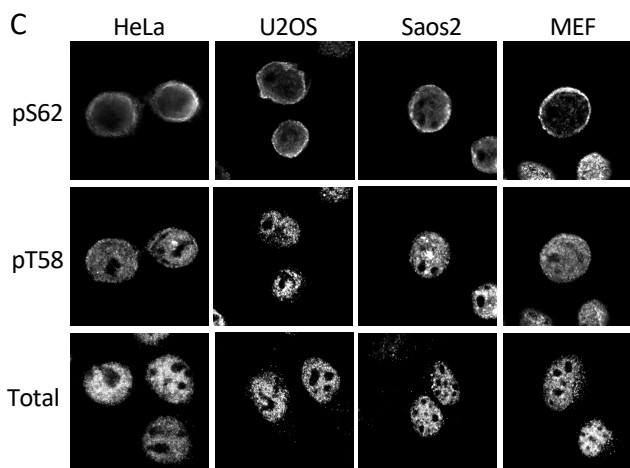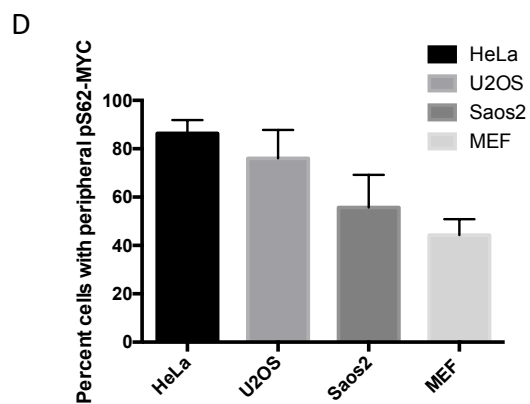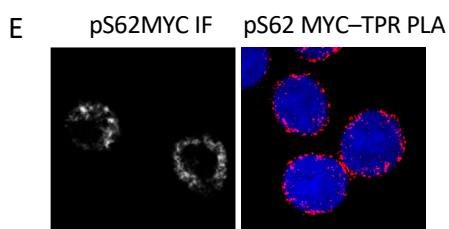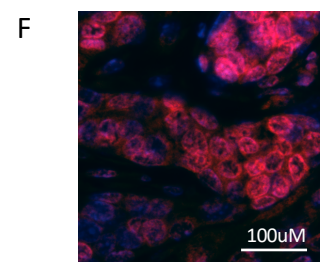

ROSA-LSL-Myc; NeuNT; Blg-cre.
