# Supplementary material for: Post-translational modification localizes MYC to the nuclear pore basket to regulate a subset of target genes involved in cellular responses to environmental signals
Source: PubMed Central journal article supplement — Genes Dev. 2018 Nov 1;32(21-22):1398–419. doi: 10.1101/gad.314377.118 (PMC6217735; doi:10.1101/gad.314377.118), 2018-11-01
Supplement: supp_gad.314377.118_Supplemental_Figure_8.pdf [file supp_gad.314377.118_Supplemental_Figure_8.pdf]

A MYC binding at 0hr

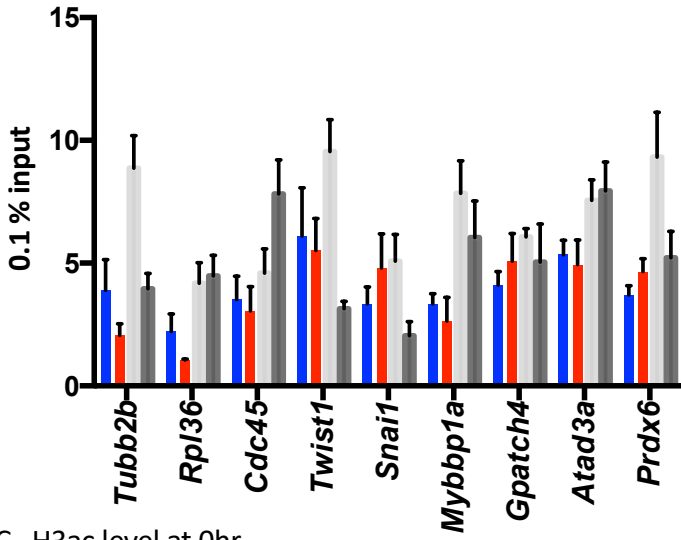

B MYC binding induction

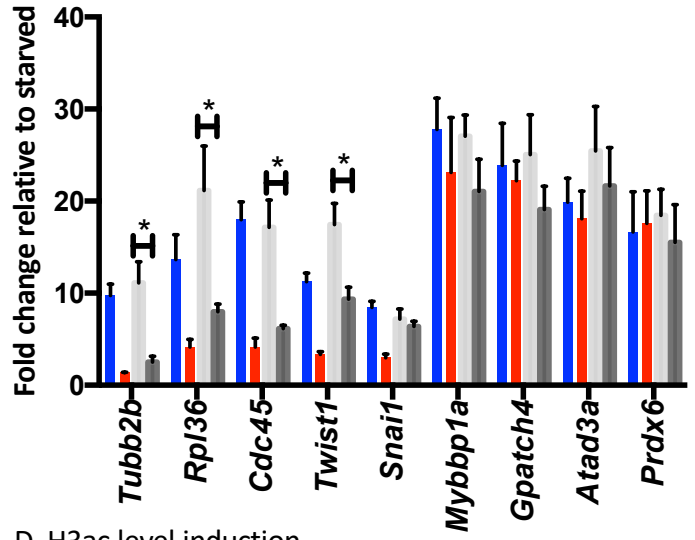

C H3ac level at 0hr

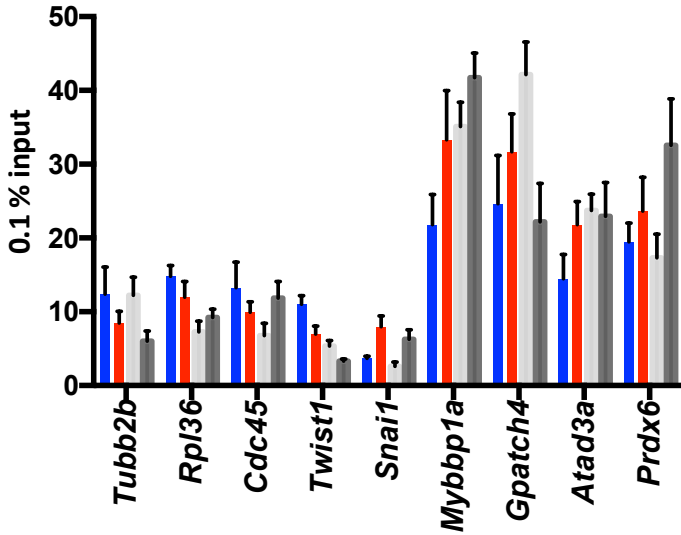

D H3ac level induction

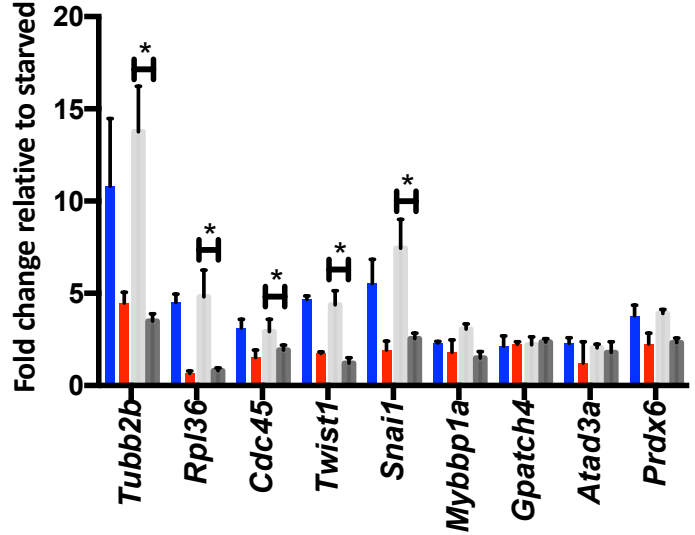

E mRNA induction

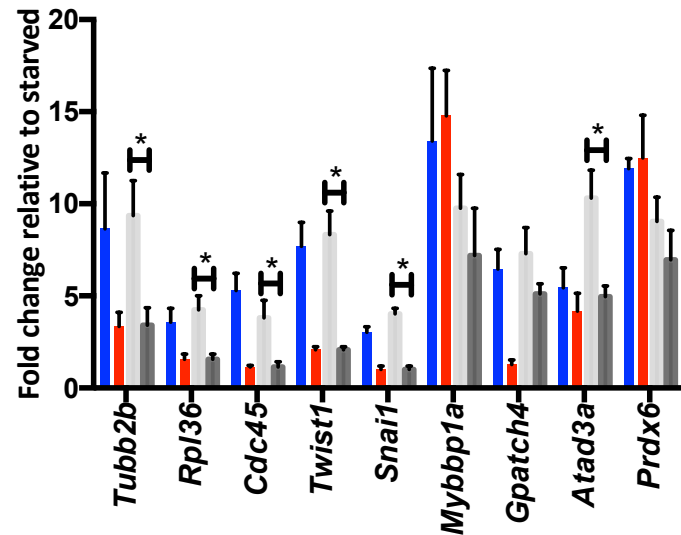

(A-E)

■ WT

■ PIN1 KO

■ PIN1 KO + MYC T58A

■ PIN1 KO + MYC S62A
