# Supplementary material for: Post-translational modification localizes MYC to the nuclear pore basket to regulate a subset of target genes involved in cellular responses to environmental signals
Source: PubMed Central journal article supplement — Genes Dev. 2018 Nov 1;32(21-22):1398–419. doi: 10.1101/gad.314377.118 (PMC6217735; doi:10.1101/gad.314377.118), 2018-11-01

Supplemental\_Figure\_9 for Figure 6.

A

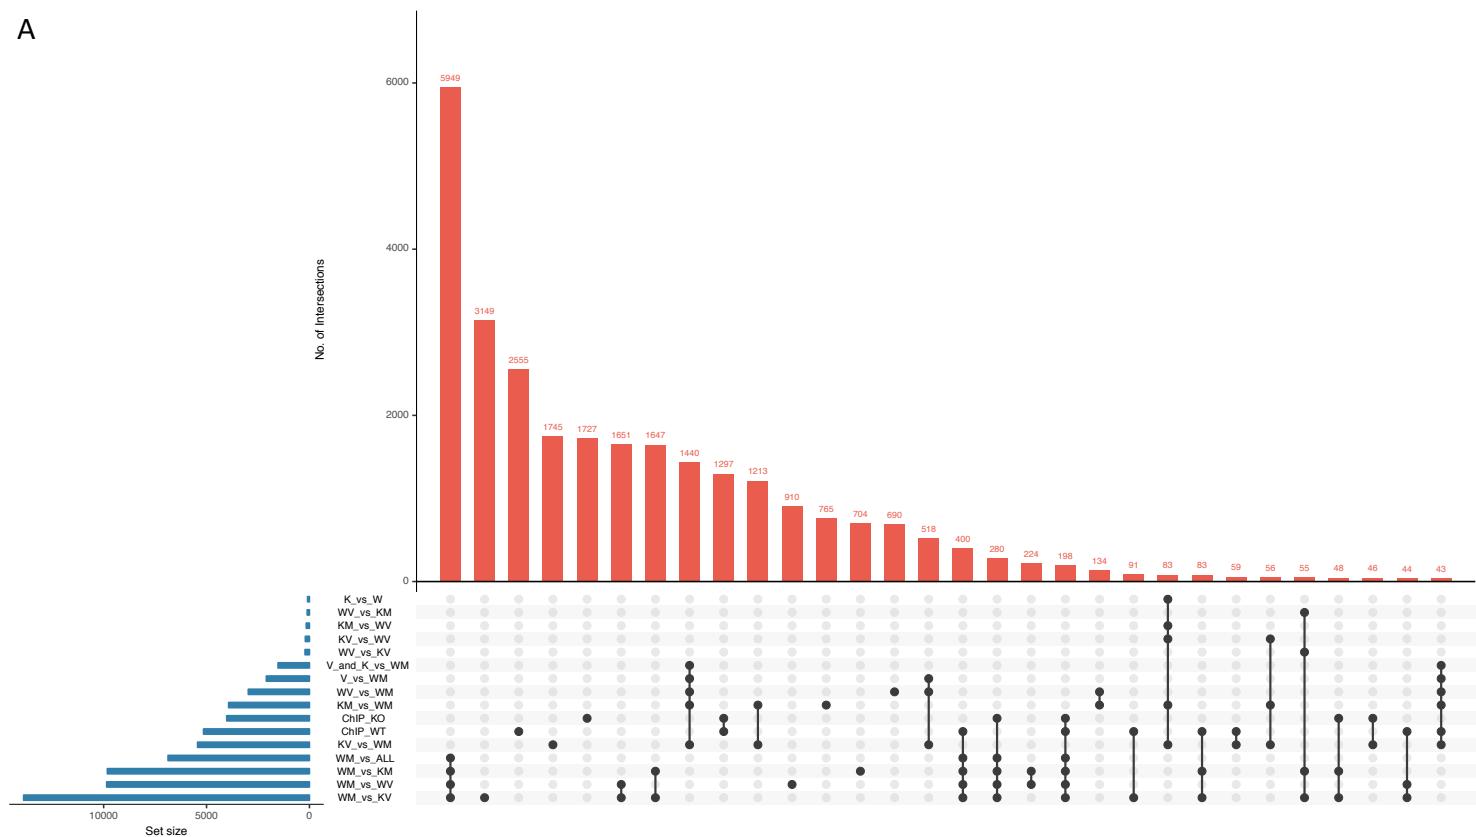

B

| Differentially Accessible<br>ATAC-seq Peak Set | Myc ChIP-seq Peak Set |             |
|------------------------------------------------|-----------------------|-------------|
|                                                | Pin1 Null             | Pin1 WT     |
| KM_vs_WM                                       | 0.010083044           | 9.08E-06    |
| KM_vs_WV                                       | 0.226273495           | 0.000388948 |
| KV_vs_WM                                       | 8.96E-11              | 3.64E-16    |
| KV_vs_WV                                       | 0.097113433           | 0.000338353 |
| WM_vs_KM                                       | 3.81E-155             | 2.11E-194   |
| WM_vs_KV                                       | 1.11E-117             | 1.25E-166   |
| WM_vs_WV                                       | 2.30E-127             | 1.79E-159   |
| WV_vs_KM                                       | 0.271888682           | 0.224109664 |
| WV_vs_KV                                       | 0.188762329           | 0.165689907 |
| WV_vs_WM                                       | 1.19E-07              | 5.71E-07    |

C

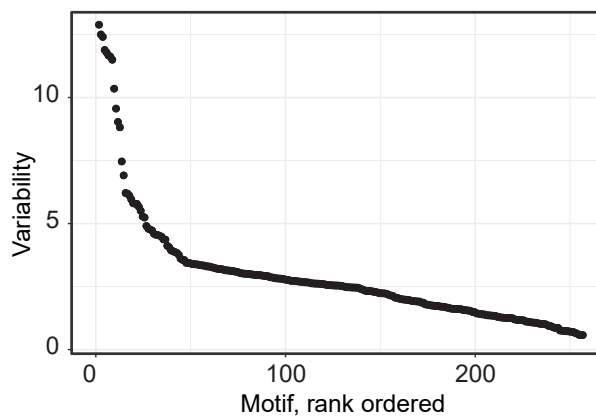

D

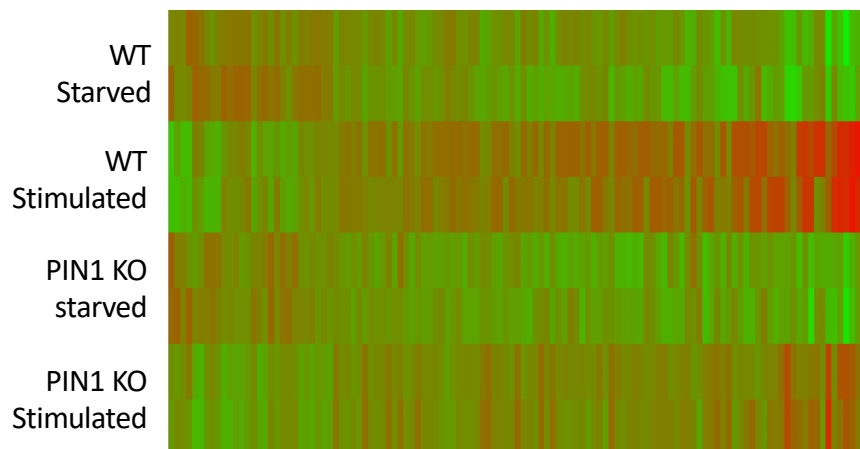

Supplement: supp_gad.314377.118_Supplemental_Figure_9.pdf [file supp_gad.314377.118_Supplemental_Figure_9.pdf]
