# Supplementary material for: Post-translational modification localizes MYC to the nuclear pore basket to regulate a subset of target genes involved in cellular responses to environmental signals
Source: PubMed Central journal article supplement — Genes Dev. 2018 Nov 1;32(21-22):1398–419. doi: 10.1101/gad.314377.118 (PMC6217735; doi:10.1101/gad.314377.118), 2018-11-01
Supplement: supp_gad.314377.118_Supplemental_Figure_11.pdf [file supp_gad.314377.118_Supplemental_Figure_11.pdf]

## Supplemental\_Figure\_11

### RT-PCR Primers

| Target  | Foward                | Reverse                  |
|---------|-----------------------|--------------------------|
| Tubb2b  | TCATCAGACCCACTGACACAG | TTTCCAGTTGCAAATCACTGTC   |
| Cdc45   | AATCGGTACACGAACATAGCC | CTGTCCCCAGTAGGAACCAA     |
| Rpl36   | ATCAGGTAAGTGGGCCTCGT  | TGTGTCTCGGCTTACTGACG     |
| Twist1  | GCACCAAGGCTGCTCTATCT  | TCTCAAGACGTGGCCACATC     |
| Snai1   | CCGGAGTTGACTACCGACCTT | GACCTAGGTAGTCGGGGTAC     |
| Mybbp1a | GCCGCGAGTTCTTGGACTT   | ATCTCCGAATCATTGGGCCTT    |
| Gpatch4 | AAGAGCCGTGGGATGAAGT   | GCCTGGGTAATGCCATTCT      |
| Atad3a  | CAATGGGGCGGGAGGGTGTGA | CGAGGAGGTGTGGGAGGCAGAGAA |
| Prdx6   | CAATAGGAAGGAAGCGCAAG  | CAAGTCTGGTTCTTGCCACA     |
| IgH     | CCCAGACCCATGTCTCAACT  | GTCACAATGTGCCTGGTTTG     |
| TBP     | TCCCCCTCTGCACTGAAATC  | AGTGCCGCCCAAGTAGCA       |

### ChIP Primers

| Target  | Foward                    | Reverse                     |
|---------|---------------------------|-----------------------------|
| Tubb2b  | ATTTTGGACCCACCTATCC       | GACCCAAGACAGCAAGAAGC        |
| Cdc45   | TATACGCTGGTCCGGTTTC       | CTTCTCTGTTTCGCTCCAC         |
| Rpl36   | CACCAAACACACCAAGTTCCG     | CTTTTATTGGGGGAGGGTTC        |
| Twist1  | GGACAAGCTGAGCAAGATTCA     | CGGAGAAGGCGTAGCTGAG         |
| Snai1   | GCGTGTGTGGAGTTCACCTTC     | GGTTGAGGACCTCGGGC           |
| Mybbp1a | AGCCACGTGTTTGGCTC         | GGGCTCTTCATCTCCGCC          |
| Gpatch4 | CCTAGAAGGGCCAAAGTTCA      | ACGTGTGACACCCGACTTG         |
| Atad3a  | TGGACGACGGAAACCTAGGAG     | GGCGGCTGAGAACGTCTTG         |
| Prdx6   | GGACGTGGCTCCCACTTT        | CGAGGGTGGGAGAAGAGAATG       |
| IgH     | TTCTGAGCATTGCAGACTAATCTTG | CCTAGACAGTTTATTTCCCAACTTCTC |

### FISH Probes

| Target | Probes      |
|--------|-------------|
| Cdc45  | RP24-147G19 |
| Rpl36  | RP24-185A16 |
| Twist1 | RP24-216P10 |
| Snai1  | RP24-329I19 |
| Prdx6  | RP24-149F17 |
| IgH    | RP23-123N21 |
