# Supplementary figures and images for: Post-translational modification localizes MYC to the nuclear pore basket to regulate a subset of target genes involved in cellular responses to environmental signals
Source: PubMed Central journal article supplement — Genes Dev. 2018 Nov 1;32(21-22):1398–419. doi: 10.1101/gad.314377.118 (PMC6217735; doi:10.1101/gad.314377.118), 2018-11-01

A Day 8:

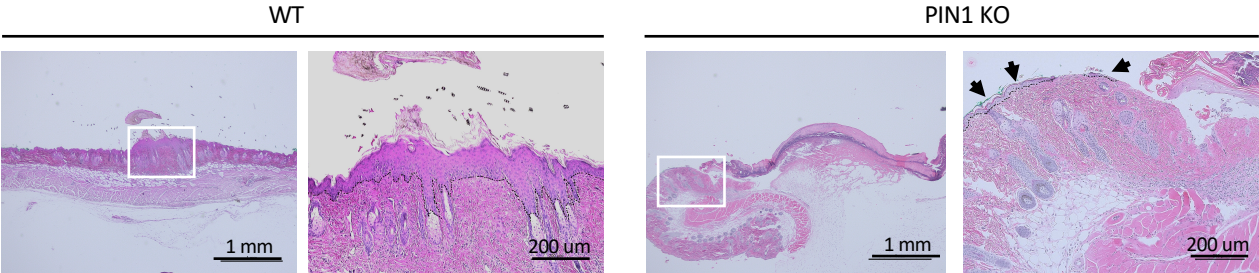

B Day 8:

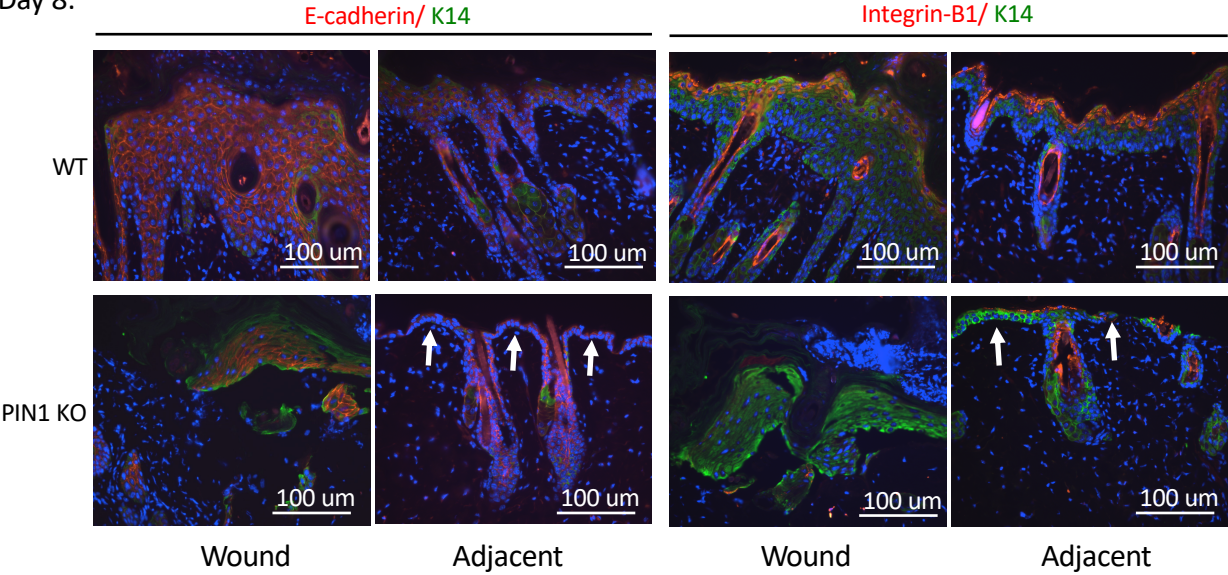

Supplement: supp_gad.314377.118_Supplemental_Figure_10.pdf [file supp_gad.314377.118_Supplemental_Figure_10.pdf]

Supplemental\_Figure\_2 for Figures 1 and 2.

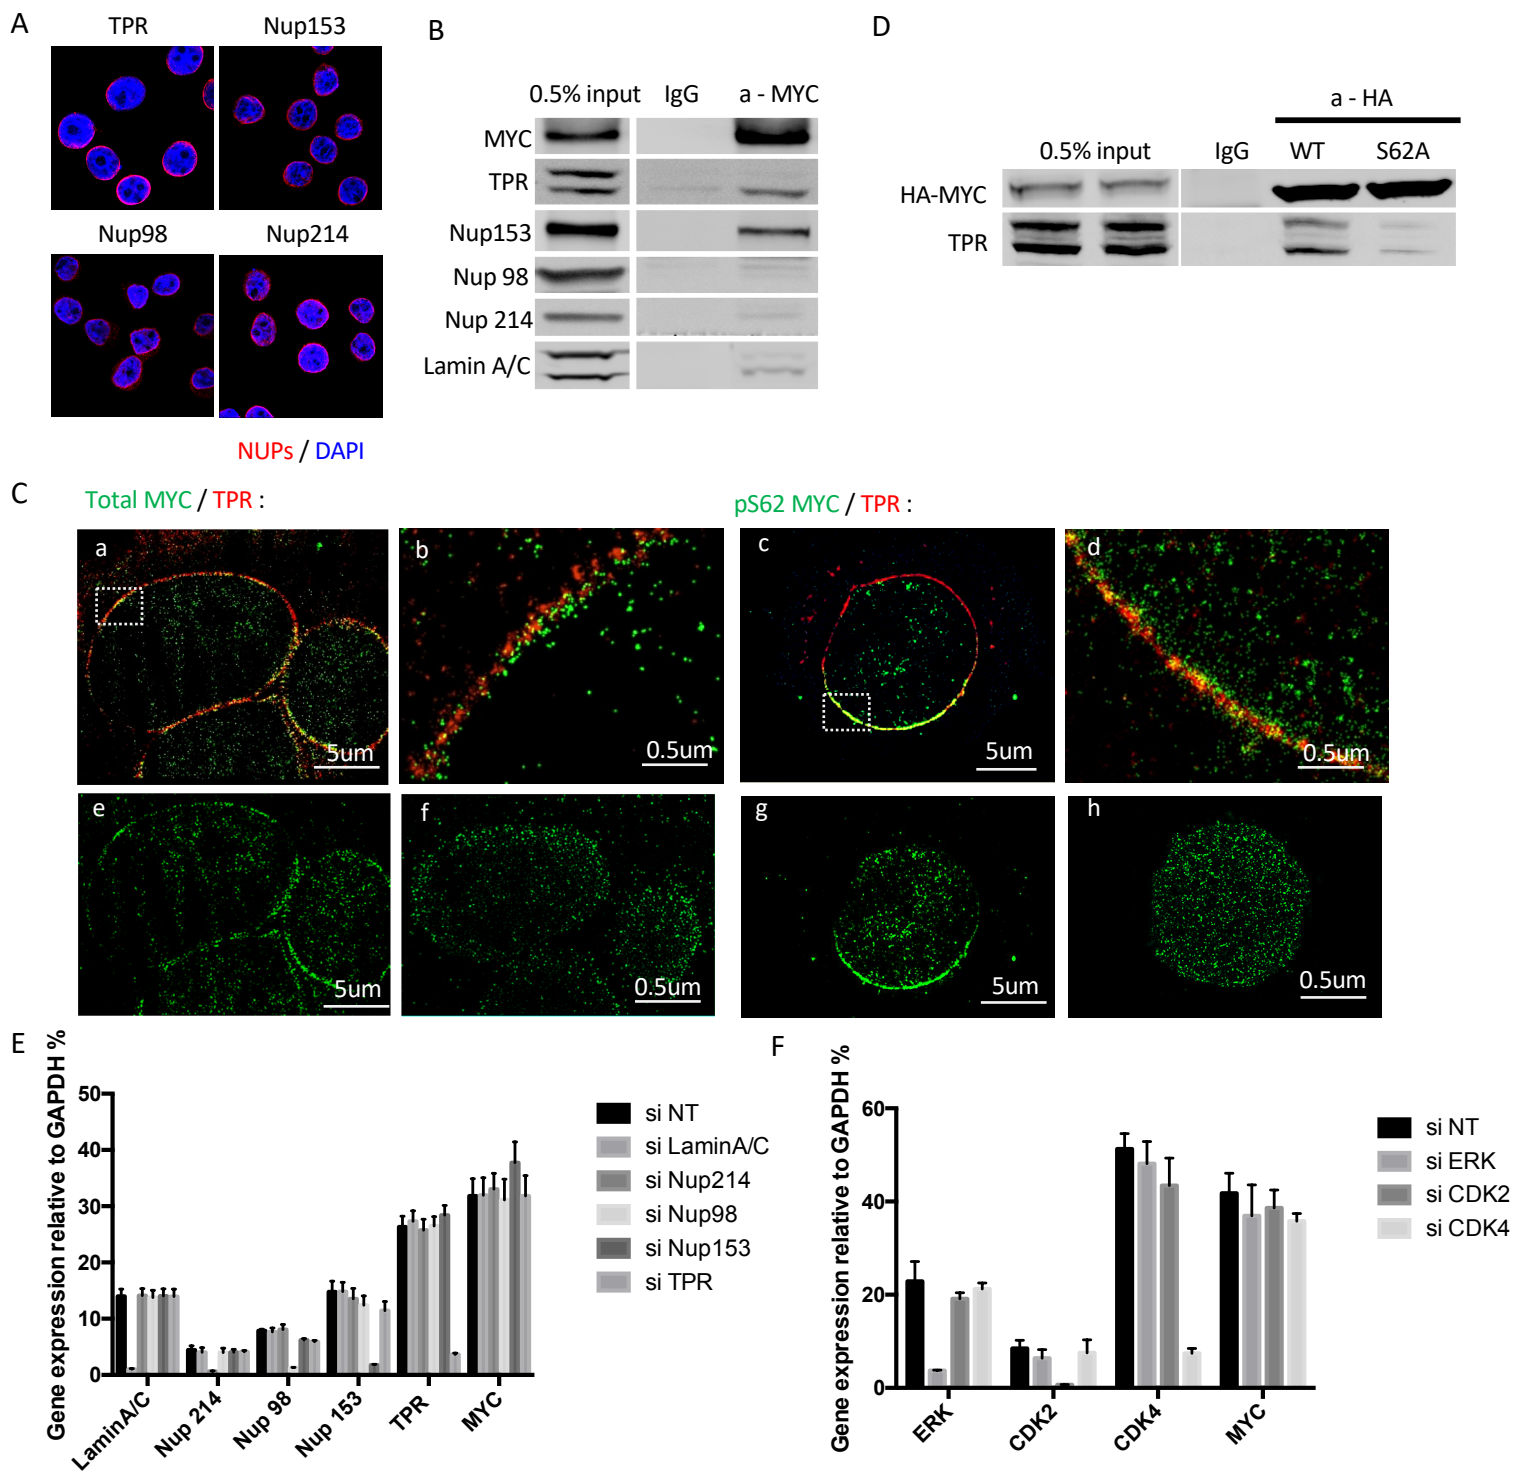

Supplement: supp_gad.314377.118_Supplemental_Figure_2.pdf [file supp_gad.314377.118_Supplemental_Figure_2.pdf]

Supplemental\_Figure\_4 for Figure 4.

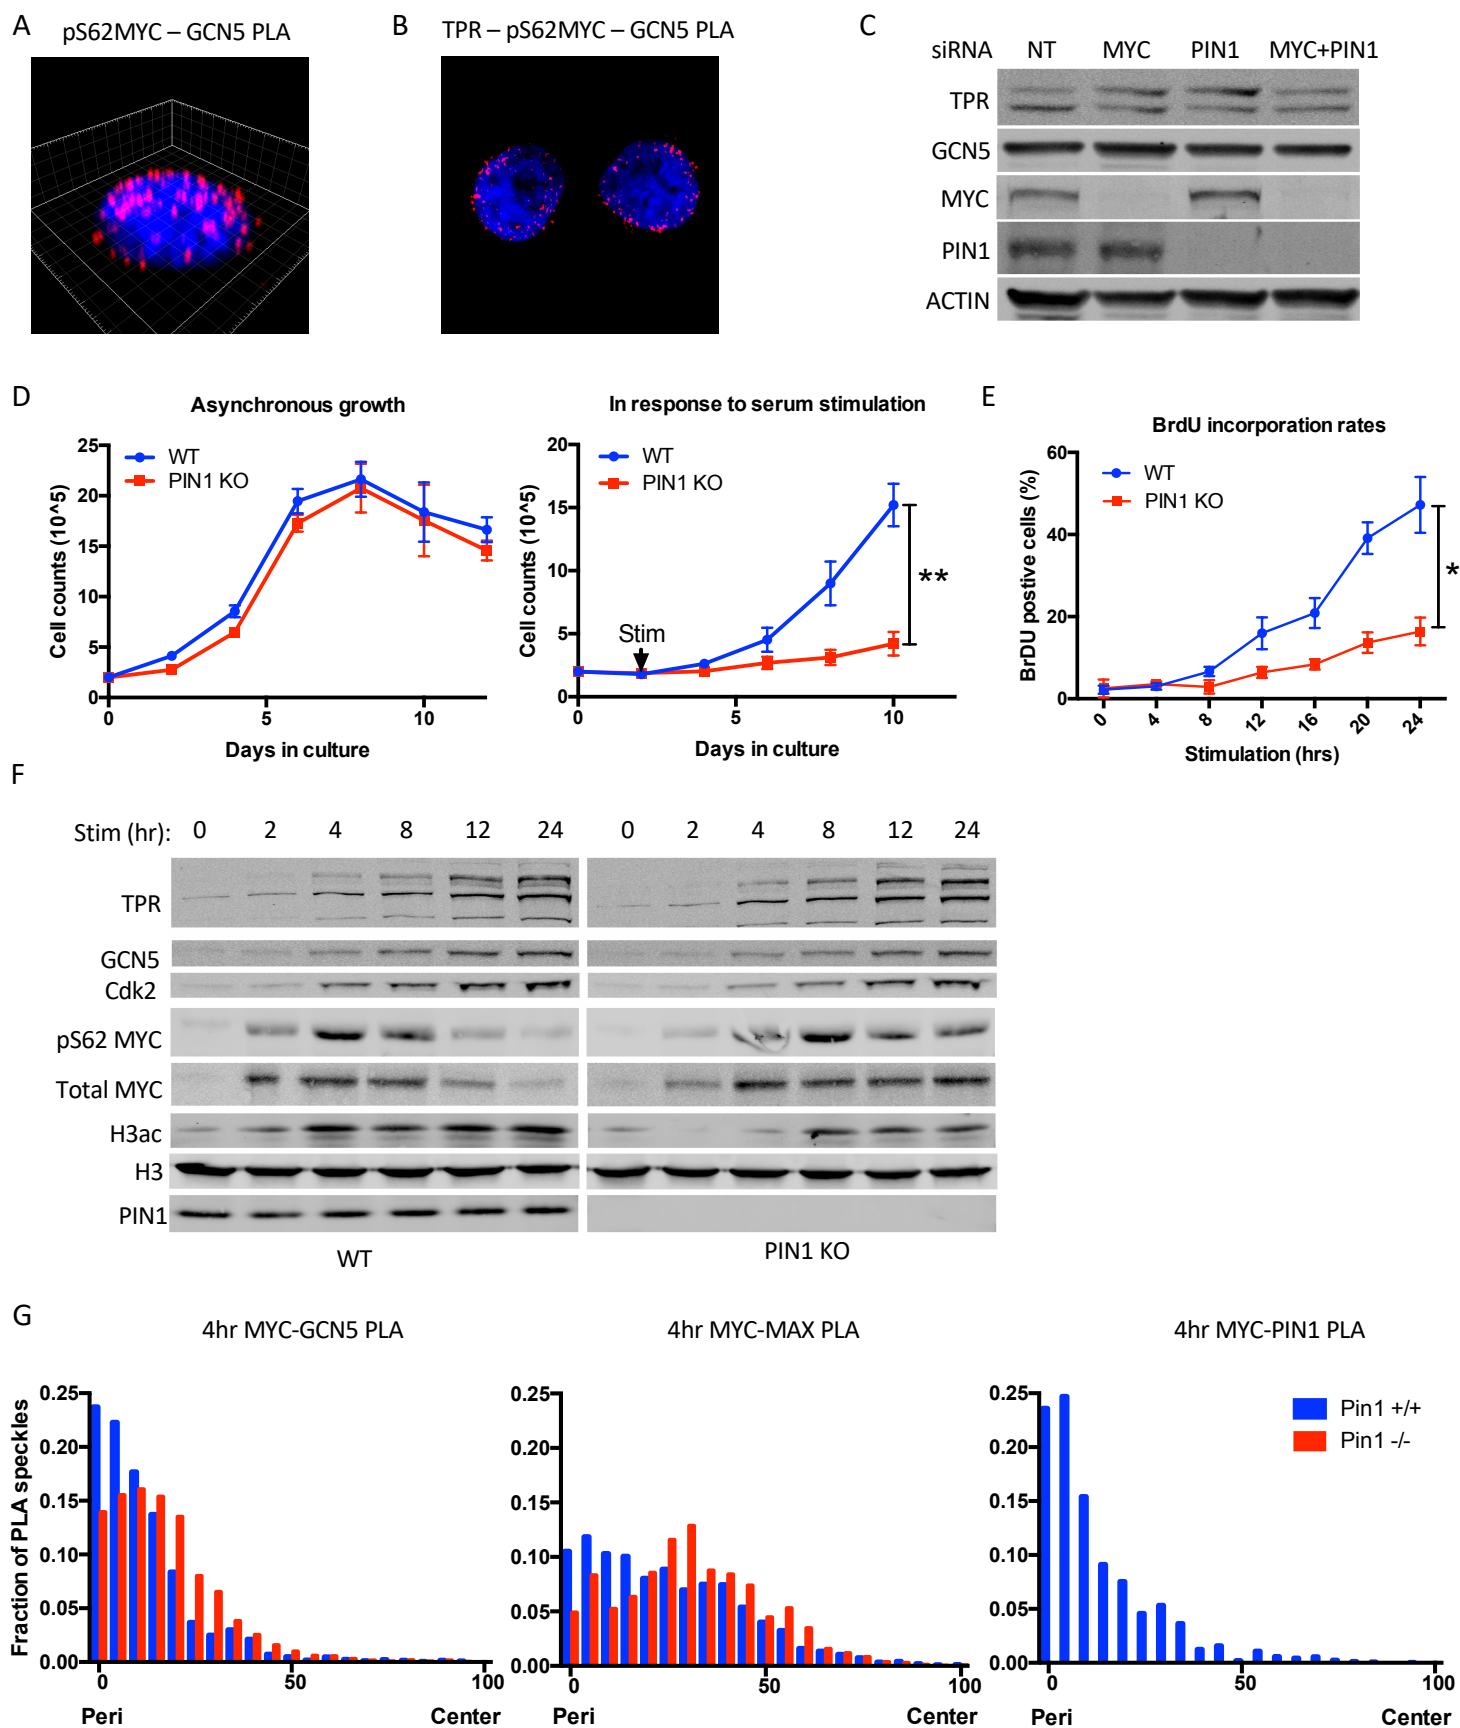

Supplement: supp_gad.314377.118_Supplemental_Figure_4.pdf [file supp_gad.314377.118_Supplemental_Figure_4.pdf]

Supplemental\_Figure\_5 for Figure 5.

A

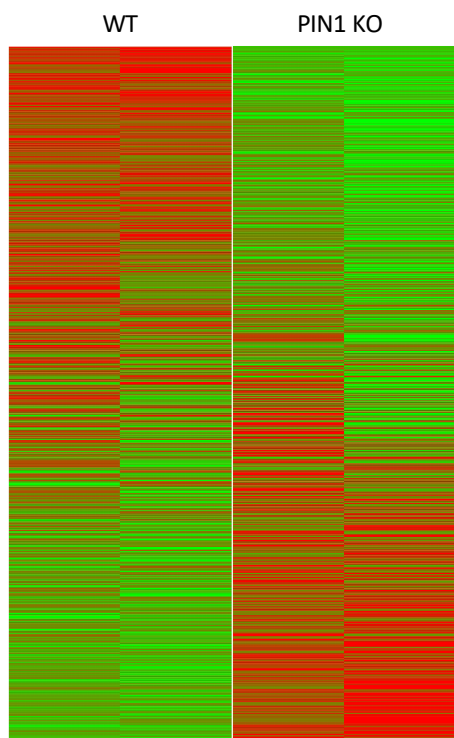

B

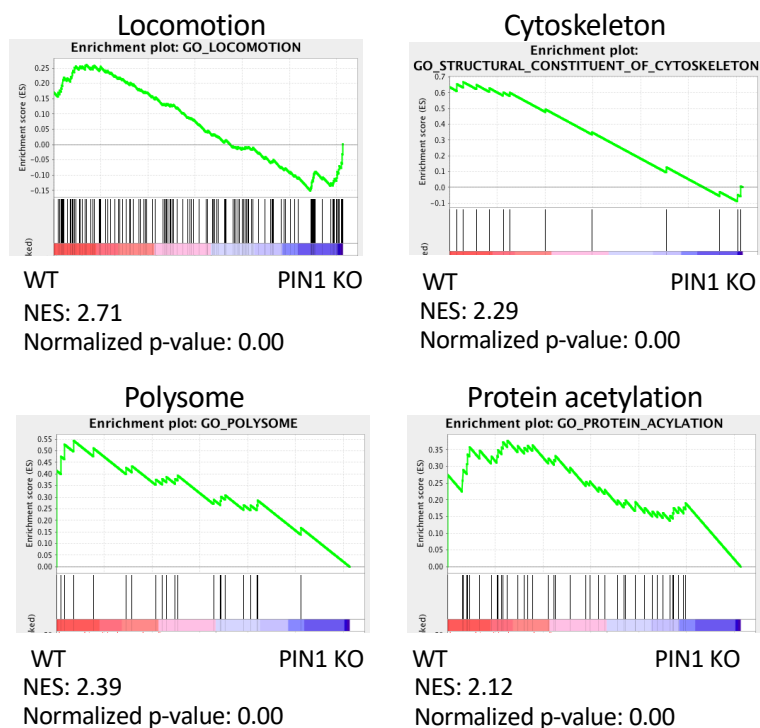

C

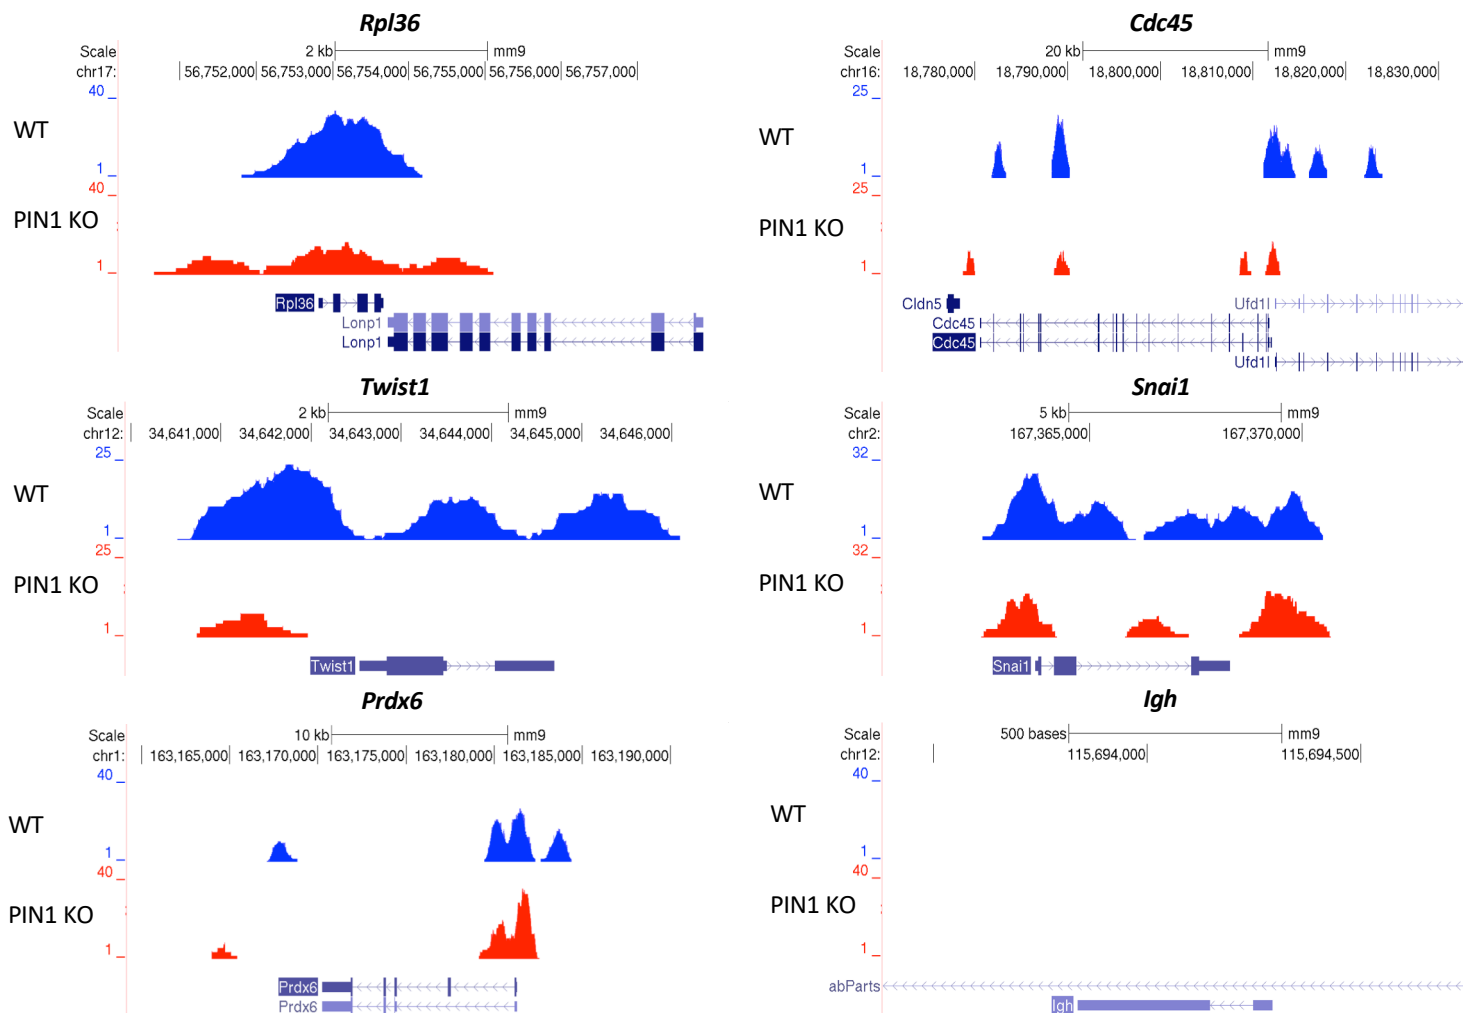

Supplement: supp_gad.314377.118_Supplemental_Figure_5.pdf [file supp_gad.314377.118_Supplemental_Figure_5.pdf]

Supplemental\_Figure\_6 for Figure 5.

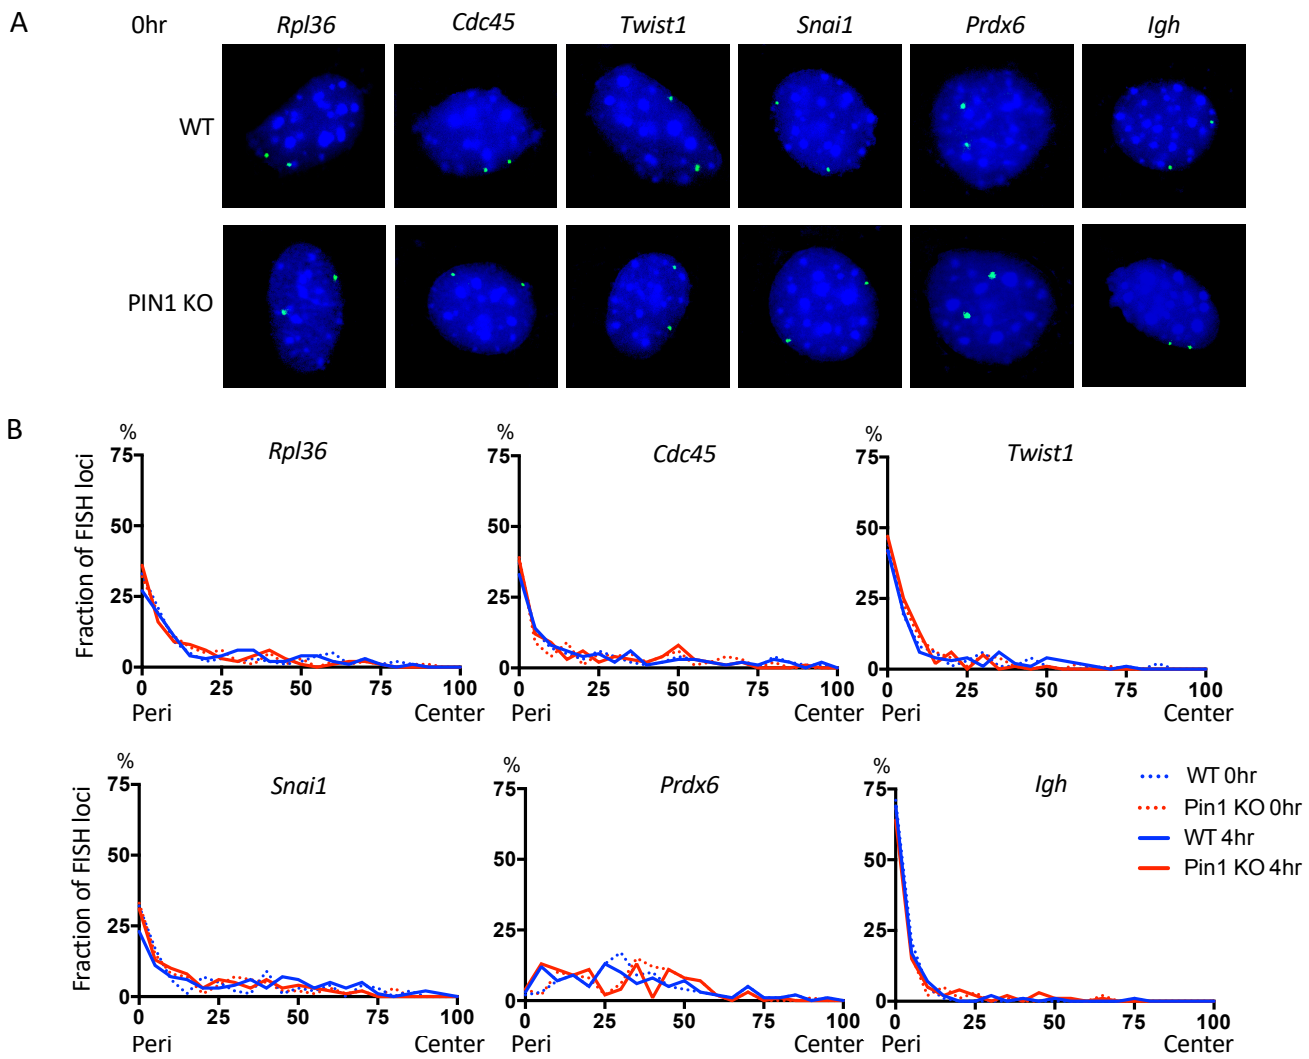

Supplement: supp_gad.314377.118_Supplemental_Figure_6.pdf [file supp_gad.314377.118_Supplemental_Figure_6.pdf]

Supplemental\_Figure\_7 for Figure 5.

A MYC binding

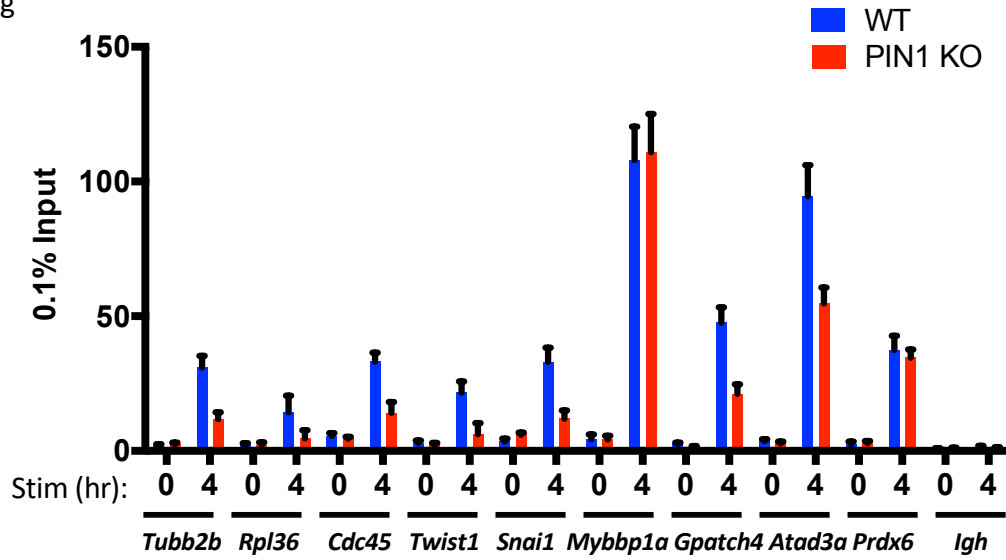

B GCN5 binding

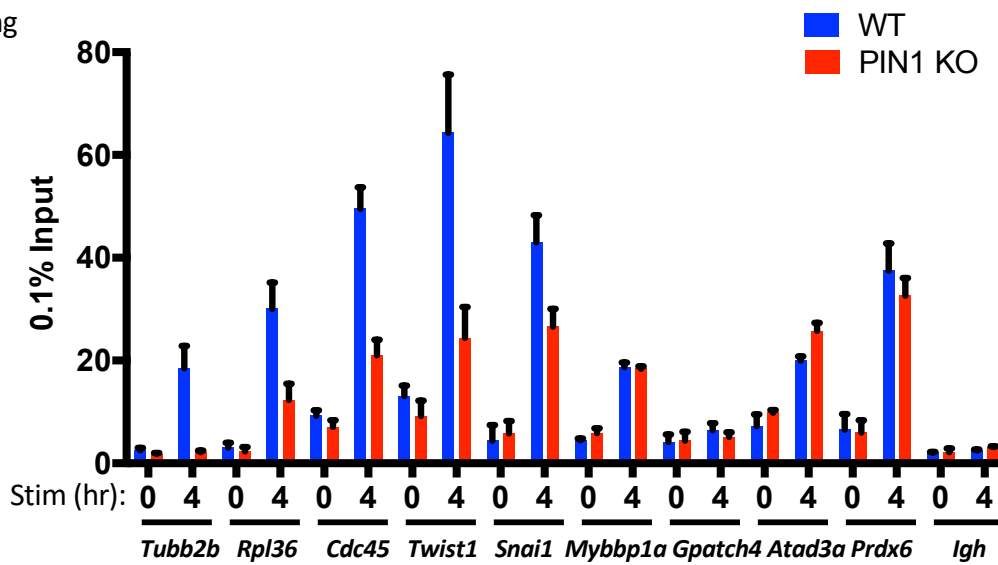

C H3ac levels

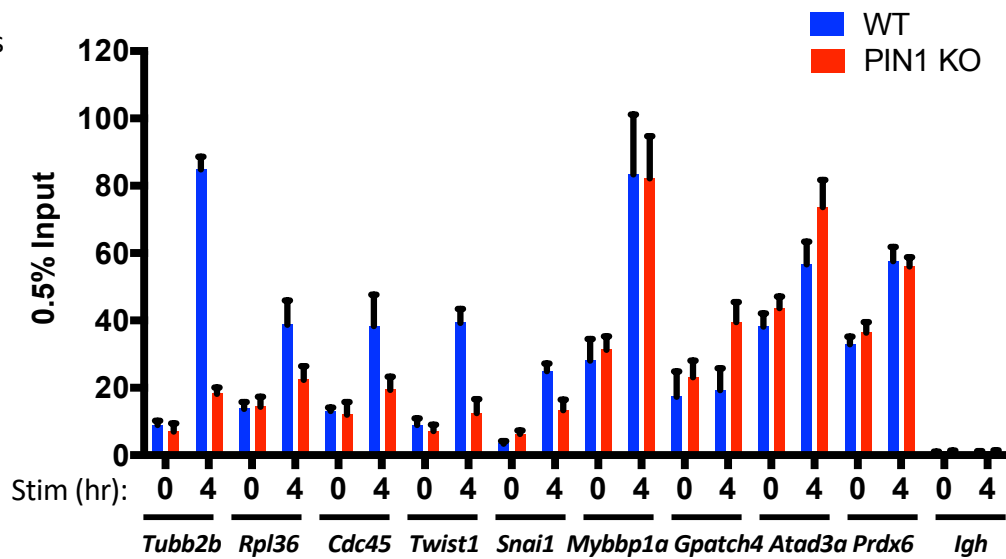

Supplement: supp_gad.314377.118_Supplemental_Figure_7.pdf [file supp_gad.314377.118_Supplemental_Figure_7.pdf]
